# Supplementary material for: Surprising robustness of a unit cell: isomorphism in caesium 18-crown[6] complexes with aromatic polycarboxylate anions
Source: Royal Society of Chemistry journal article supplement (doi:10.1039/c0ce00363h), 2010-11-09
Supplement: c0ce00363h.pdf [file c0ce00363h.pdf]

# Surprising robustness of a unit cell: Isomorphism in caesium 18-crown[6] complexes with aromatic polycarboxylate anions of varying shape and size

Dario Braga, Simone D'Agostino and Fabrizia Grepioni

## ELECTRONIC SUPPORTING INFORMATION (5 pages)

Comparison between experimental diffraction patterns recorded on products obtained by grinding (blue lines) and from crystallization (red lines) and diffraction patterns computed on the basis of the single crystal structures for complexes **2**, **3**, **4**, **5**, **6** and **8**.

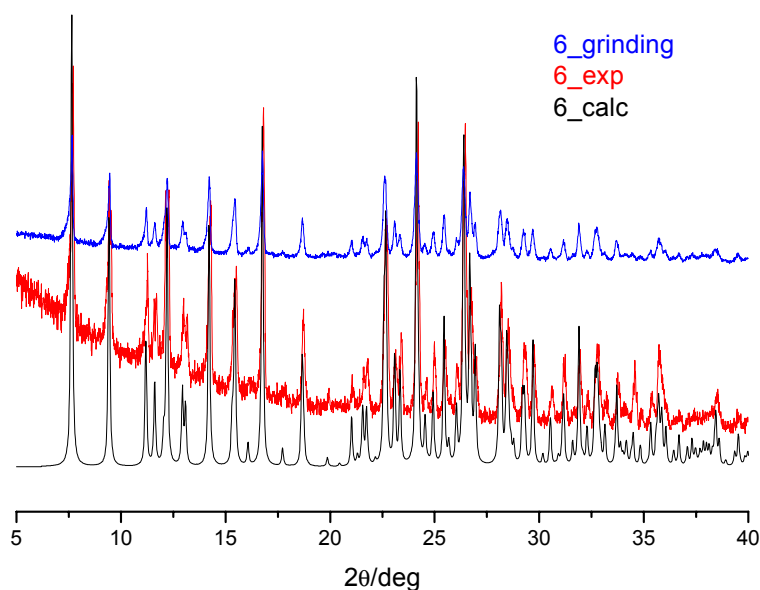

Figure ESI-1. 18-crown[6] · Cs[OH-isoH] (**2**).

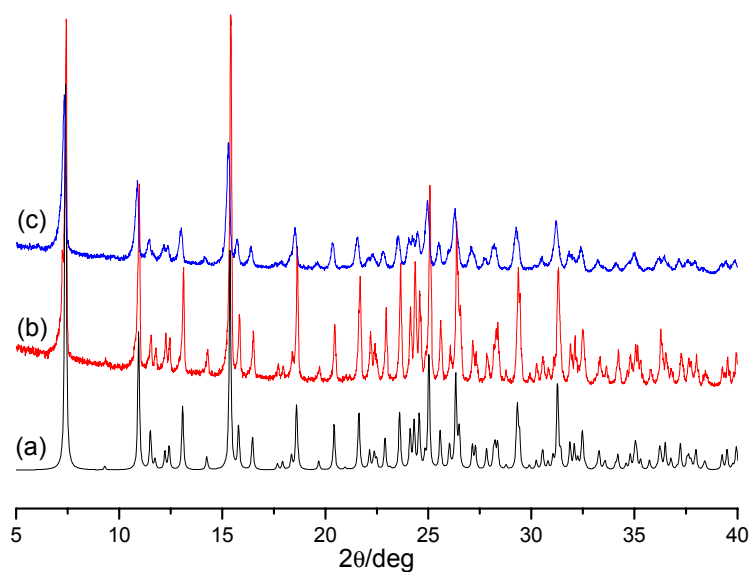

Figure ESI-2. 18-crown[6] · Cs[CH<sub>3</sub>-isoH] (**3**).

(a) Calculated, (b) exp. from solution, (c) exp. from grinding.

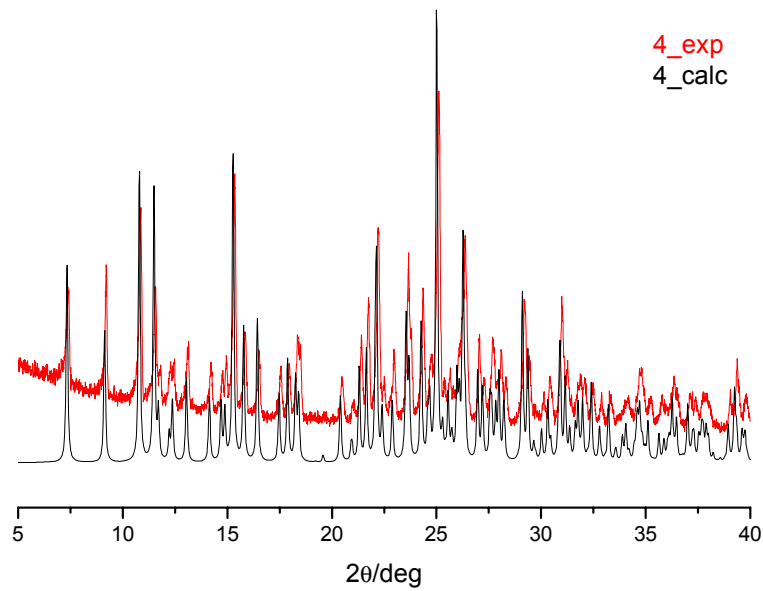

Figure ESI-3. 18-crown[6]·Cs[Br-isoH] (4).

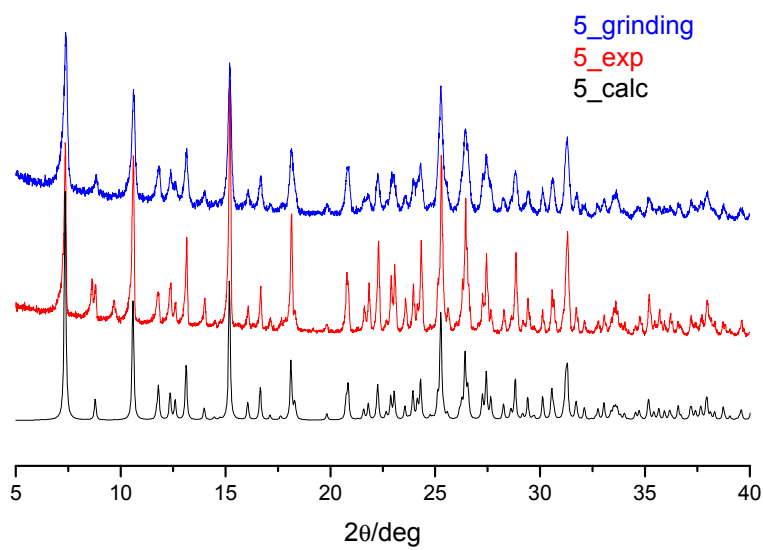

Figure ESI-4. 18-crown[6]·Cs[OCH<sub>3</sub>-isoH] (5).

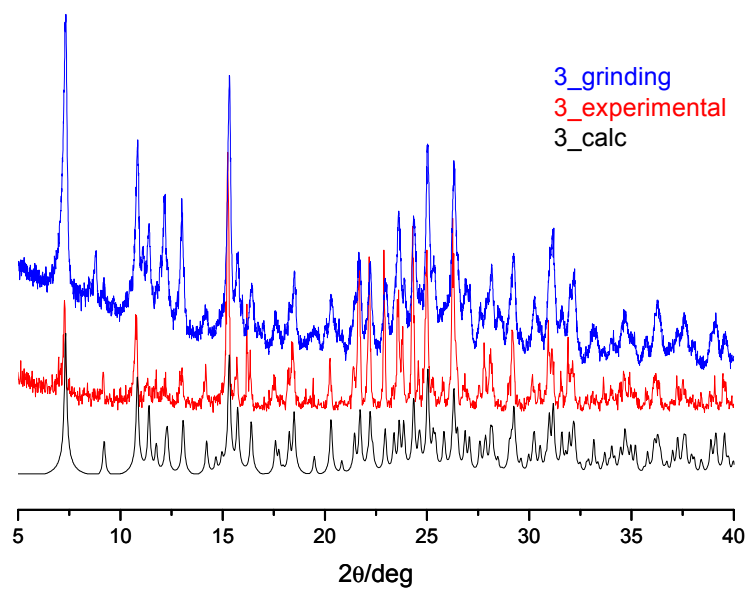

Figure ESI-5. 18-crown[6]·Cs[NO<sub>2</sub>-isoH] (6).

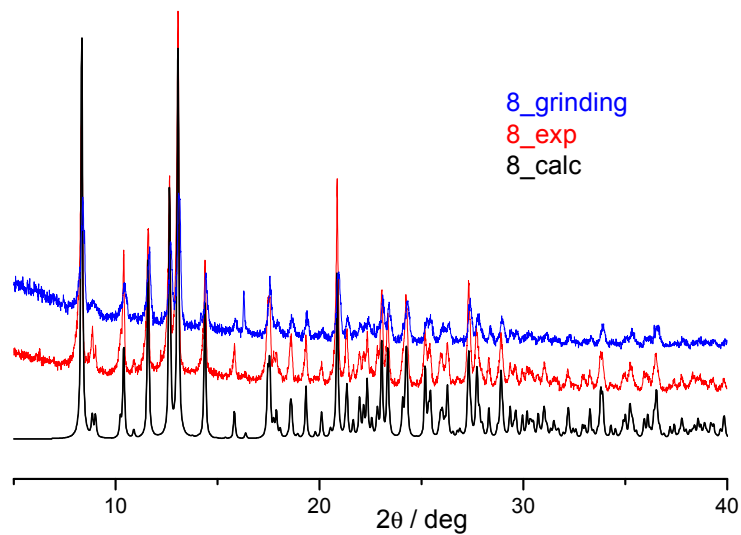

**Figure ESI-6.** 18-crown[6]·Cs[t-Butyl-isoH] (**8**).

### ORTEP drawings

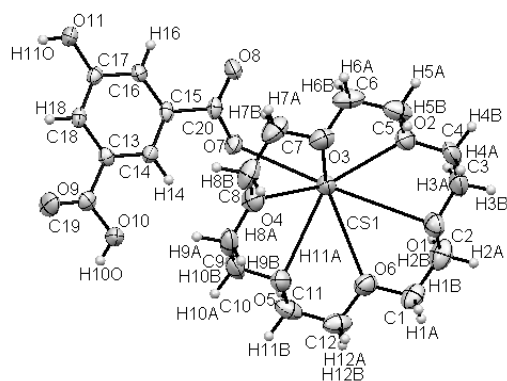

ORTEP representation of complex **2**

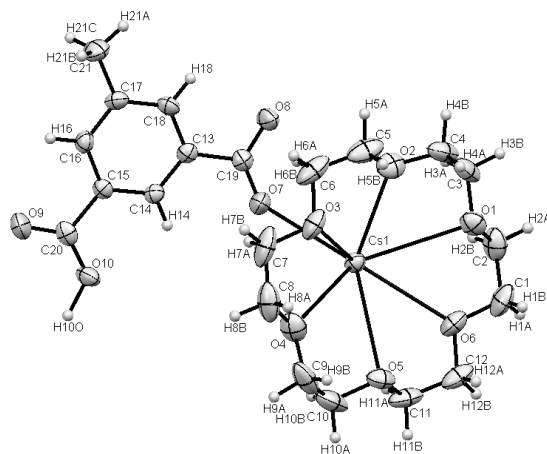

ORTEP representation of complex **3**

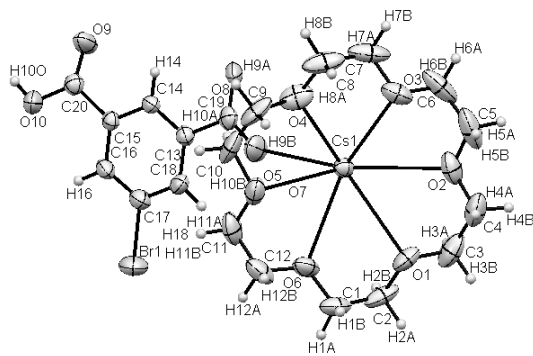

ORTEP representation of complex 4

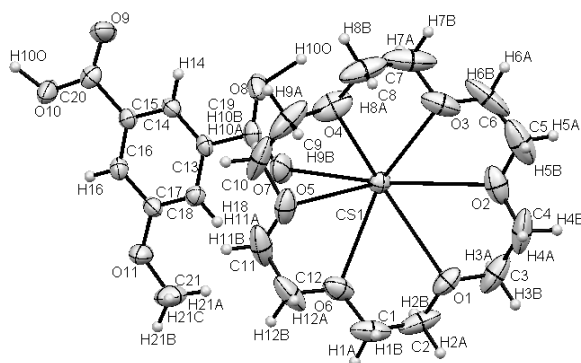

ORTEP representation of complex 5

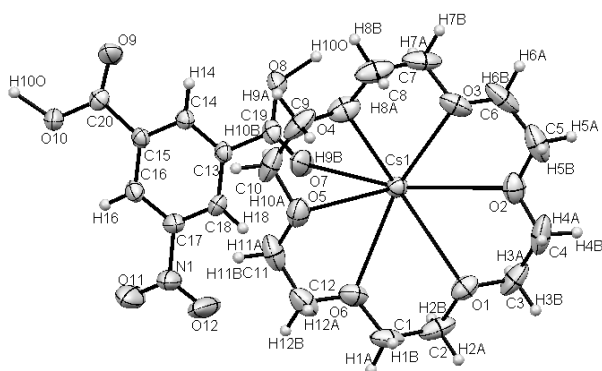

ORTEP representation of complex 6

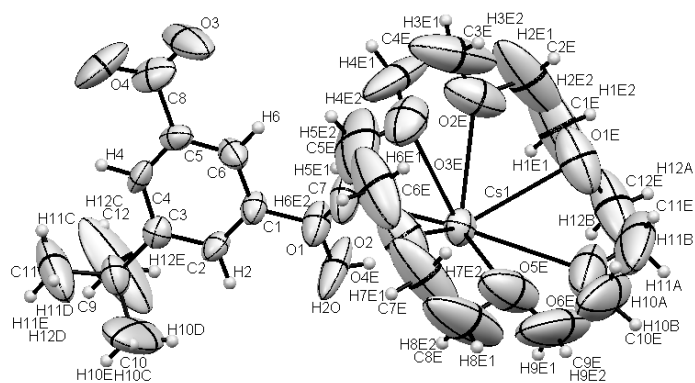

ORTEP representation of complex 8
